# Supplementary material
Source: publisher site journal article supplement (https://www.dovepress.com/article/300886)
Supplement: Supplementary file 1 [file get_supplementary_file.php]

| **Table S1.       Slit Lamp Fluorescence Grades in Rabbit Corneas, pilot study** | | | | | | | | | |
| --- | --- | --- | --- | --- | --- | --- | --- | --- | --- |
| *loading minutes:* | | | 0 | 2.5 | 4.5 | 6.5 | 8.5 | 10.5 | 12.5 |
| **Rabbit ID** | **Eye** | **Treatment** |  |  |  |  |  |  |  |
| 5322 | OD | 1 | 0 | 0 | 0 | 0 | 2 | 2 | 3 |
| 5322 | OS | 2 | 0 | 0 | 0 | 1 | 1 | 2 | 3 |
| 5323 | OD | 2 | 0 | 0 | 1 | 1 | 2 | 2 | 3 |
| 5323 | OS | 1 | 0 | 0 | 1 | 2 | 3 | 3 | 3 |
| 5324 | OD | 1 | 0 | 0 | 0 | 1 | 1 | 2 | 3 |
| 5324 | OS | 2 | 0 | 0 | 0 | 1 | 2 | 3 | 3 |
| 5325 | OD | 2 | 0 | 0 | 0 | 0 | 0 | 1 | 3 |
| 5325 | OS | 1 | 0 | 0 | 0 | 1 | 1 | 1 | 3 |

| **Table S2.       Slit Lamp Fluorescence Grades in Rabbit Corneas, main study**   |  |  |  |  |  | ***Riboflavin Fluorescence Grades*** | | | | | | | --- | --- | --- | --- | --- | --- | --- | --- | --- | --- | --- | | **Group** | **Rabbit**  **ID** | **Eye** | **Treatment** | **Baseline** | **T=0** | **T=10** | **T=15** | **T=20** | **T=25** | **T=30** | | SS1 | 5566 | OD | 1 | 0 | 3 | 2 | 2 | 2 | 2 | 2 | | SS1 | 5567 | OD | 1 | 0 | 3 | 3 | 3 | 2 | 2 | 1 | | SS1 | 5568 | OD | 1 | 0 | 3 | 3 | 3 | 2 | 1 | 1 | | SS1 | 5570 | OD | 1 | 0 | 3 | 3 | 3 | 2 | 2 | 2 | | SS1 | 5579 | OD | 1 | 0 | 2 | 3 | 3 | 2 | 2 | 2 | | SS1 | 5581 | OD | 1 | 0 | 3 | 3 | 3 | 3 | 3 | 2 | | SS3 | 5582 | OD | 1 | 0 | 3 | 3 | 3 | 3 | 3 | 3 | | SS3 | 5585 | OD | 1 | 0 | 3 | 3 | 3 | 3 | 3 | 2 | | SS2 | 5559 | OS | 1 | 0 | 4 | 4 | 3 | 3 | 2 | 2 | | SS2 | 5560 | OS | 1 | 0 | 4 | 4 | 3 | 3 | 3 | 2 | | SS2 | 5561 | OS | 1 | 0 | 3 | 3 | 3 | 3 | 3 | 2 | | SS2 | 5562 | OS | 1 | 0 | 3 | 3 | 3 | 3 | 3 | 2 | | SS2 | 5564 | OS | 1 | 0 | 2 | 3 | 3 | 3 | 3 | 2 | | SS2 | 5571 | OS | 1 | 0 | 3 | 3 | 2 | 2 | 2 | 2 | | SS3 | 5583 | OS | 1 | 0 | 3 | 4 | 3 | 3 | 3 | 3 | | SS3 | 5584 | OS | 1 | 0 | 2 | 3 | 3 | 3 | 3 | 2 | | SS1 | 5566 | OS | 2 | 0 | 3 | 2 | 2 | 2 | 2 | 1 | | SS1 | 5567 | OS | 2 | 0 | 3 | 3 | 2 | 2 | 2 | 2 | | SS1 | 5568 | OS | 2 | 0 | 3 | 4 | 3 | 3 | 3 | 2 | | SS1 | 5570 | OS | 2 | 0 | 3 | 3 | 3 | 2 | 1 | 1 | | SS1 | 5579 | OS | 2 | 0 | 3 | 3 | 3 | 3 | 3 | 2 | | SS1 | 5581 | OS | 2 | 0 | 3 | 3 | 3 | 2 | 2 | 2 | | SS3 | 5582 | OS | 2 | 0 | 3 | 2 | 2 | 2 | 2 | 1 | | SS3 | 5585 | OS | 2 | 0 | 3 | 3 | 3 | 2 | 2 | 2 | | SS2 | 5559 | OD | 2 | 0 | 3 | 3 | 3 | 2 | 2 | 2 | | SS2 | 5560 | OD | 2 | 0 | 2 | 3 | 1 | 1 | 1 | 1 | | SS2 | 5561 | OD | 2 | 0 | 2 | 3 | 2 | 2 | 2 | 2 | | SS2 | 5562 | OD | 2 | 0 | 3 | 3 | 2 | 2 | 2 | 2 | | SS2 | 5564 | OD | 2 | 0 | 2 | 3 | 3 | 2 | 2 | 2 | | SS2 | 5571 | OD | 2 | 0 | 2 | 3 | 2 | 2 | 1 | 1 | | SS3 | 5583 | OD | 2 | 0 | 1 | 1 | 1 | 1 | 1 | 1 | | SS3 | 5584 | OD | 2 | 0 | 2 | 2 | 2 | 2 | 1 | 1 | |
| --- | --- | --- | --- | --- | --- | --- | --- | --- | --- | --- | --- | --- | --- | --- | --- | --- | --- | --- | --- | --- | --- | --- | --- | --- | --- | --- | --- | --- | --- | --- | --- | --- | --- | --- | --- | --- | --- | --- | --- | --- | --- | --- | --- | --- | --- | --- | --- | --- | --- | --- | --- | --- | --- | --- | --- | --- | --- | --- | --- | --- | --- | --- | --- | --- | --- | --- | --- | --- | --- | --- | --- | --- | --- | --- | --- | --- | --- | --- | --- | --- | --- | --- | --- | --- | --- | --- | --- | --- | --- | --- | --- | --- | --- | --- | --- | --- | --- | --- | --- | --- | --- | --- | --- | --- | --- | --- | --- | --- | --- | --- | --- | --- | --- | --- | --- | --- | --- | --- | --- | --- | --- | --- | --- | --- | --- | --- | --- | --- | --- | --- | --- | --- | --- | --- | --- | --- | --- | --- | --- | --- | --- | --- | --- | --- | --- | --- | --- | --- | --- | --- | --- | --- | --- | --- | --- | --- | --- | --- | --- | --- | --- | --- | --- | --- | --- | --- | --- | --- | --- | --- | --- | --- | --- | --- | --- | --- | --- | --- | --- | --- | --- | --- | --- | --- | --- | --- | --- | --- | --- | --- | --- | --- | --- | --- | --- | --- | --- | --- | --- | --- | --- | --- | --- | --- | --- | --- | --- | --- | --- | --- | --- | --- | --- | --- | --- | --- | --- | --- | --- | --- | --- | --- | --- | --- | --- | --- | --- | --- | --- | --- | --- | --- | --- | --- | --- | --- | --- | --- | --- | --- | --- | --- | --- | --- | --- | --- | --- | --- | --- | --- | --- | --- | --- | --- | --- | --- | --- | --- | --- | --- | --- | --- | --- | --- | --- | --- | --- | --- | --- | --- | --- | --- | --- | --- | --- | --- | --- | --- | --- | --- | --- | --- | --- | --- | --- | --- | --- | --- | --- | --- | --- | --- | --- | --- | --- | --- | --- | --- | --- | --- | --- | --- | --- | --- | --- | --- | --- | --- | --- | --- | --- | --- | --- | --- | --- | --- | --- | --- | --- | --- | --- | --- | --- | --- | --- | --- | --- | --- | --- | --- | --- | --- | --- | --- | --- | --- | --- | --- | --- | --- | --- | --- | --- | --- | --- | --- | --- | --- | --- | --- | --- | --- | --- | --- | --- | --- | --- | --- | --- | --- | --- | --- | --- | --- | --- | --- | --- | --- | --- | --- | --- | --- | --- | --- |

| **Table S3.       Individual Riboflavin Concentrations in Rabbit Cornea** | | | | |
| --- | --- | --- | --- | --- |
| **Rabbit ID** | **Corneal Tissue Weight (g)** | **Cornea Homogenate Volume (mL)** | **Homogenate Concentration (ng/ml)** | **Cornea Concentration (ng/g of tissue)** |
| 5566 | 0.08055 | 0.725 | 5160 | 46440 |
| 5567 | 0.07341 | 0.661 | 6470 | 58230 |
| 5568 | 0.07042 | 0.634 | 5570 | 50130 |
| 5570 | 0.07052 | 0.635 | 4350 | 39150 |
| 5579 | 0.06124 | 0.551 | 6920 | 62280 |
| 5581 | 0.0634 | 0.571 | 4660 | 41940 |
| 5582 | 0.06329 | 0.57 | 5240 | 47160 |
| 5585 | 0.0688 | 0.619 | 4600 | 41400 |
| 5559 | 0.05778 | 0.52 | 4660 | 41940 |
| 5560 | 0.06404 | 0.576 | 5350 | 48150 |
| 5561 | 0.05727 | 0.515 | 8000 | 72000 |
| 5562 | 0.06594 | 0.593 | 6330 | 56970 |
| 5564 | 0.06861 | 0.617 | 6040 | 54360 |
| 5571 | 0.05985 | 0.539 | 4040 | 36360 |
| 5583 | 0.06415 | 0.577 | 5190 | 46710 |
| 5584 | 0.06474 | 0.583 | 4550 | 40950 |

| **Table S4.       Individual Riboflavin-5-Phosphate Concentrations in Rabbit Cornea** | | | | |
| --- | --- | --- | --- | --- |
| **Rabbit ID** | **Corneal Tissue Weight (g)** | **Cornea Homogenate Volume (mL)** | **Homogenate Concentration (ng/ml)** | **Cornea Concentration (ng/g of tissue)** |
| 5566 | 0.08055 | 0.725 | 657 | 5913 |
| 5567 | 0.07341 | 0.661 | 1110 | 9990 |
| 5568 | 0.07042 | 0.634 | 1230 | 11070 |
| 5570 | 0.07052 | 0.635 | 603 | 5427 |
| 5579 | 0.06124 | 0.551 | 792 | 7128 |
| 5581 | 0.0634 | 0.571 | 768 | 6912 |
| 5582 | 0.06329 | 0.57 | 741 | 6669 |
| 5585 | 0.0688 | 0.619 | 909 | 8181 |
| 5559 | 0.05778 | 0.52 | 1080 | 9720 |
| 5560 | 0.06404 | 0.576 | 1090 | 9810 |
| 5561 | 0.05727 | 0.515 | 2020 | 18180 |
| 5562 | 0.06594 | 0.593 | 1410 | 12690 |
| 5564 | 0.06861 | 0.617 | 1110 | 9990 |
| 5571 | 0.05985 | 0.539 | 724 | 6516 |
| 5583 | 0.06415 | 0.577 | 885 | 7965 |
| 5584 | 0.06474 | 0.583 | 846 | 7614 |
